# Supplementary material for: Template-free hydrothermal synthesis of nickel sulfide nanocrystals on MWCNTs: efficient and stable bifunctional electroactive material for oxygen electrocatalysis
Source: Royal Society of Chemistry journal article supplement (doi:10.1039/d3se00239j), 2023-01-01
Supplement: d3se00239j1.pdf [file d3se00239j1.pdf]

*Electronic Supplementary Information*

**Template-free hydrothermal synthesis of nickel sulfide nanocrystals on MWCNTs:  
Efficient and stable bifunctional electroactive material for oxygen electrocatalysis†**

*Mamta Yadav<sup>1</sup>, Devesh Kumar Singh<sup>2</sup>, and Vellaichamy Ganesan<sup>1\*</sup>*

1 Department of Chemistry, Institute of Science, Banaras Hindu University, Varanasi-  
221005, UP, India

2 Kutir Post Graduate College, Chakkey, Jaunpur-222146, UP, India

\* Corresponding author

E-mail: [velganesh@yahoo.com](mailto:velganesh@yahoo.com) and [velgan@bhu.ac.in](mailto:velgan@bhu.ac.in)

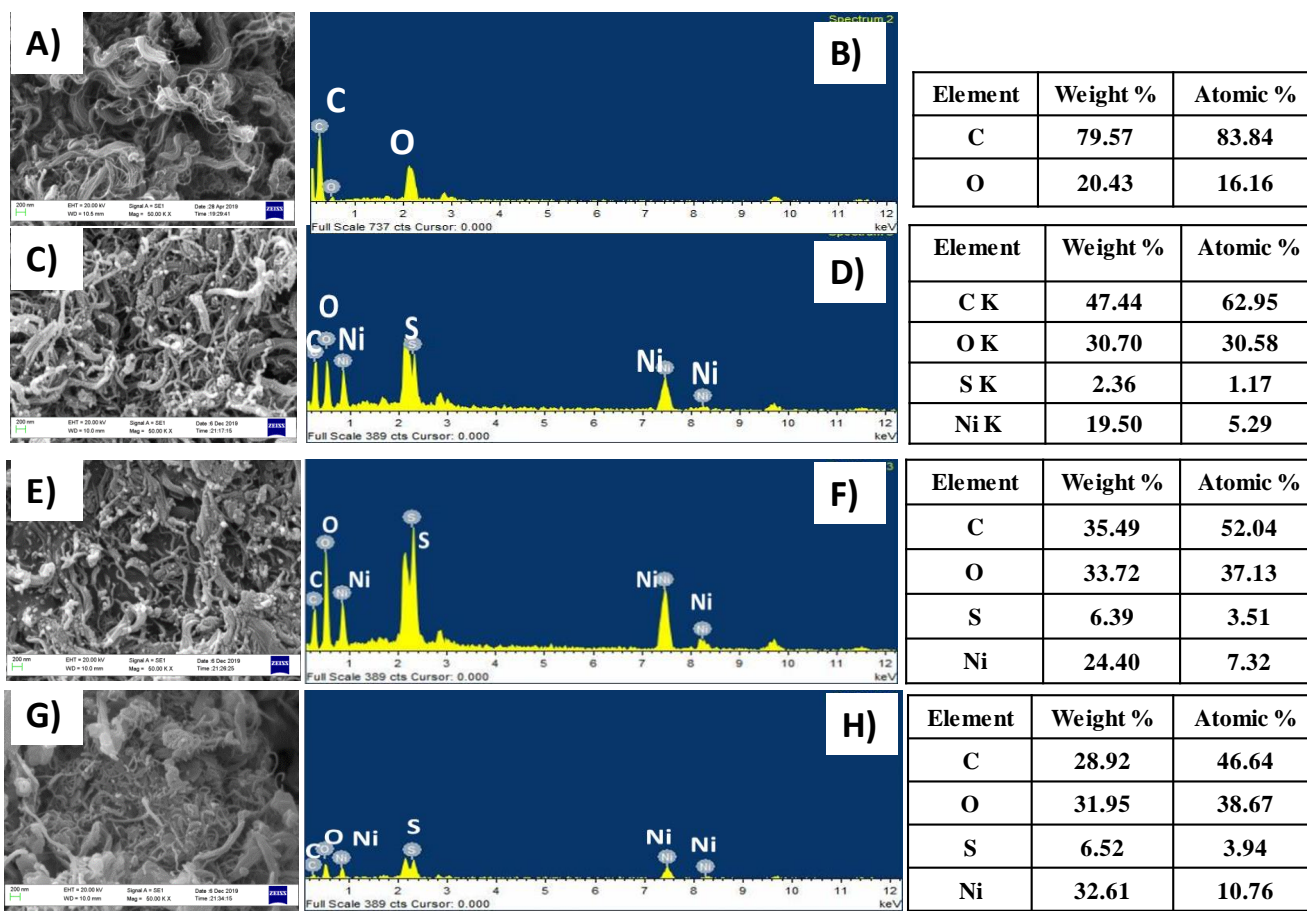

**Fig. S1** SEM (A, C, E, and G), EDAX (B, D, F, and H), and elemental composition of MWCNTs (A and B), NiS-(0.1)@MWCNTs (C and D), NiS-(0.5)@MWCNTs (E and F), and NiS (1.0)@MWCNTs (G and H).

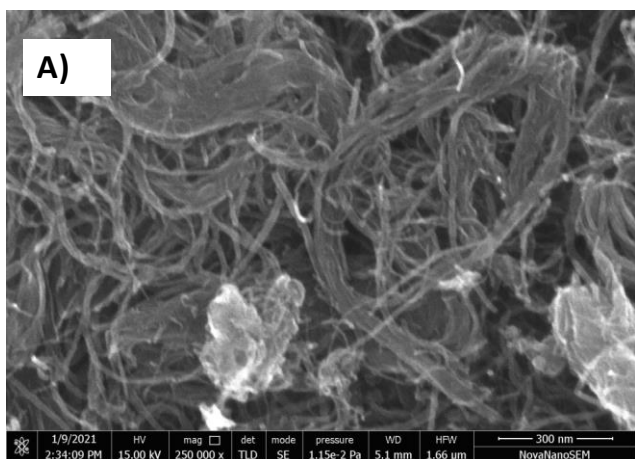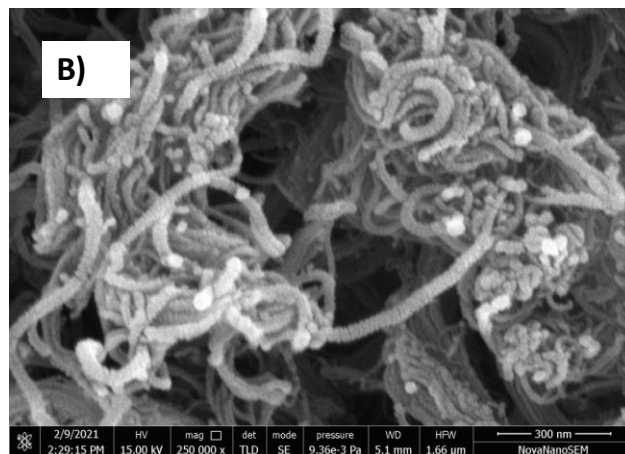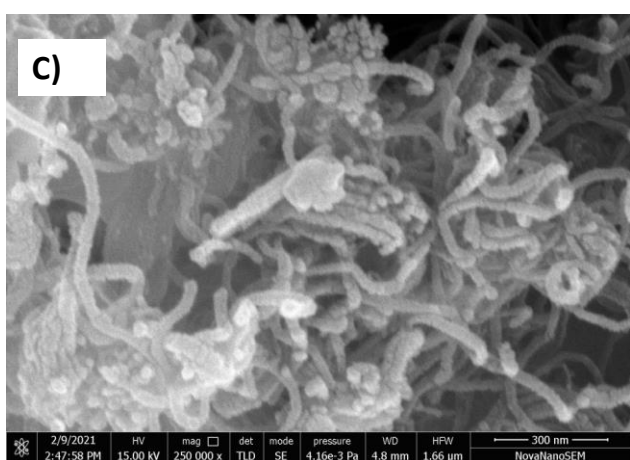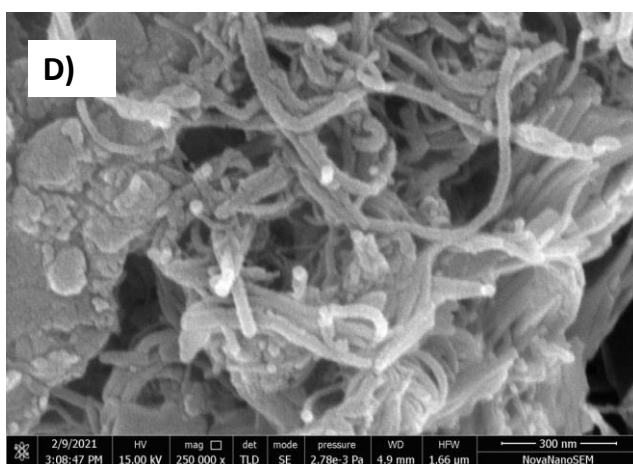

**Fig. S2** FESEM images of A) MWCNTs, B) NiS-(0.1)@MWCNTs, C) NiS-(0.5)@MWCNTs, and D) NiS-(1.0)@MWCNTs

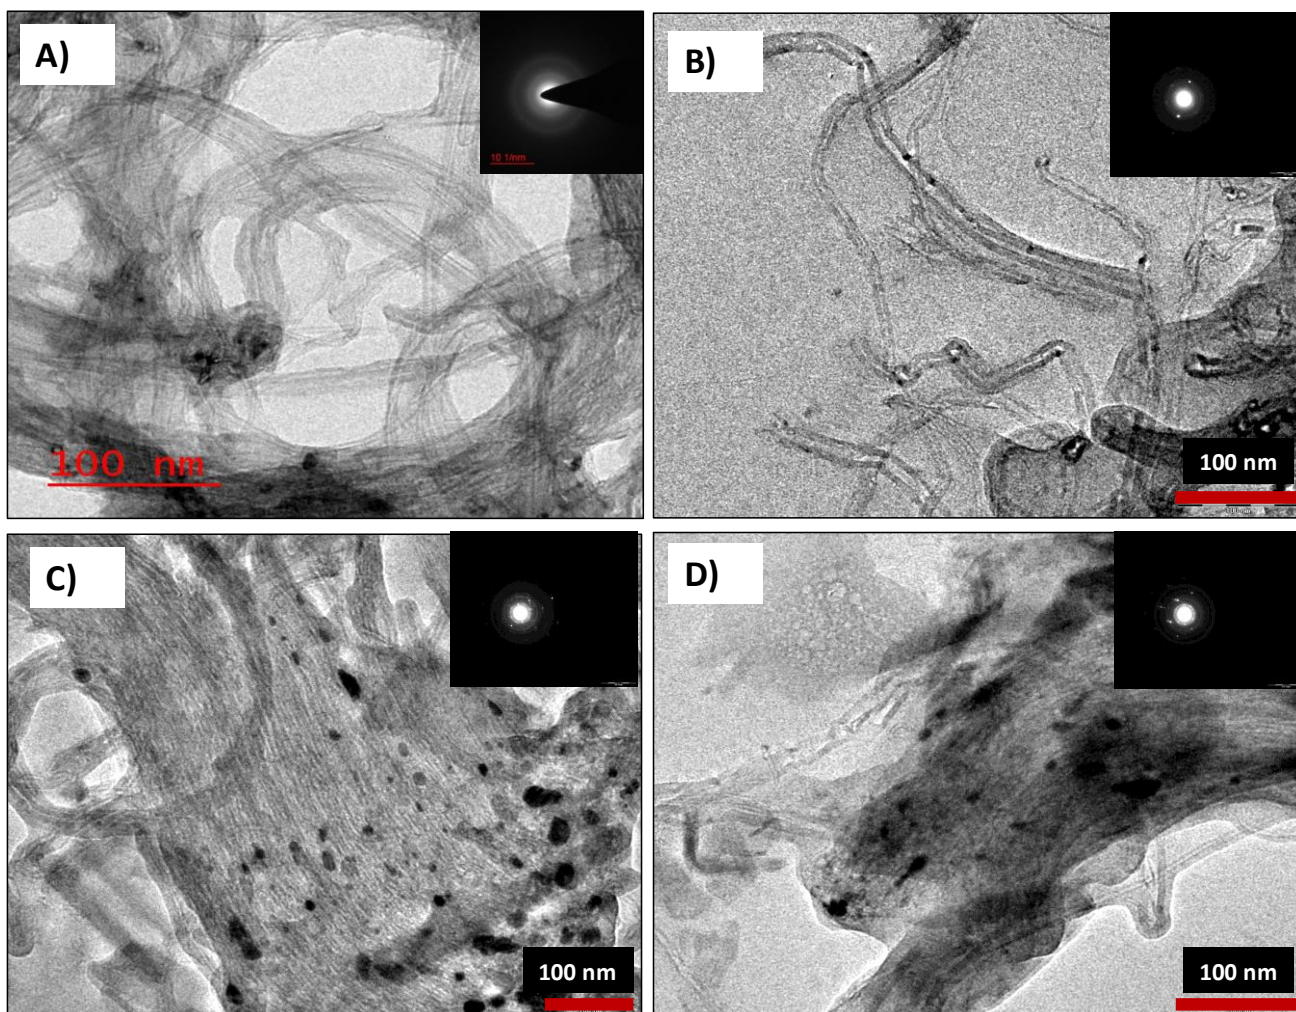

**Fig. S3** HR-TEM images of A) MWCNTs, B) NiS-(0.1)@MWCNTs, C) NiS-(0.5)@MWCNTs, and D) NiS-(1.0)@MWCNTs. Inset shows the SAED pattern of the same.

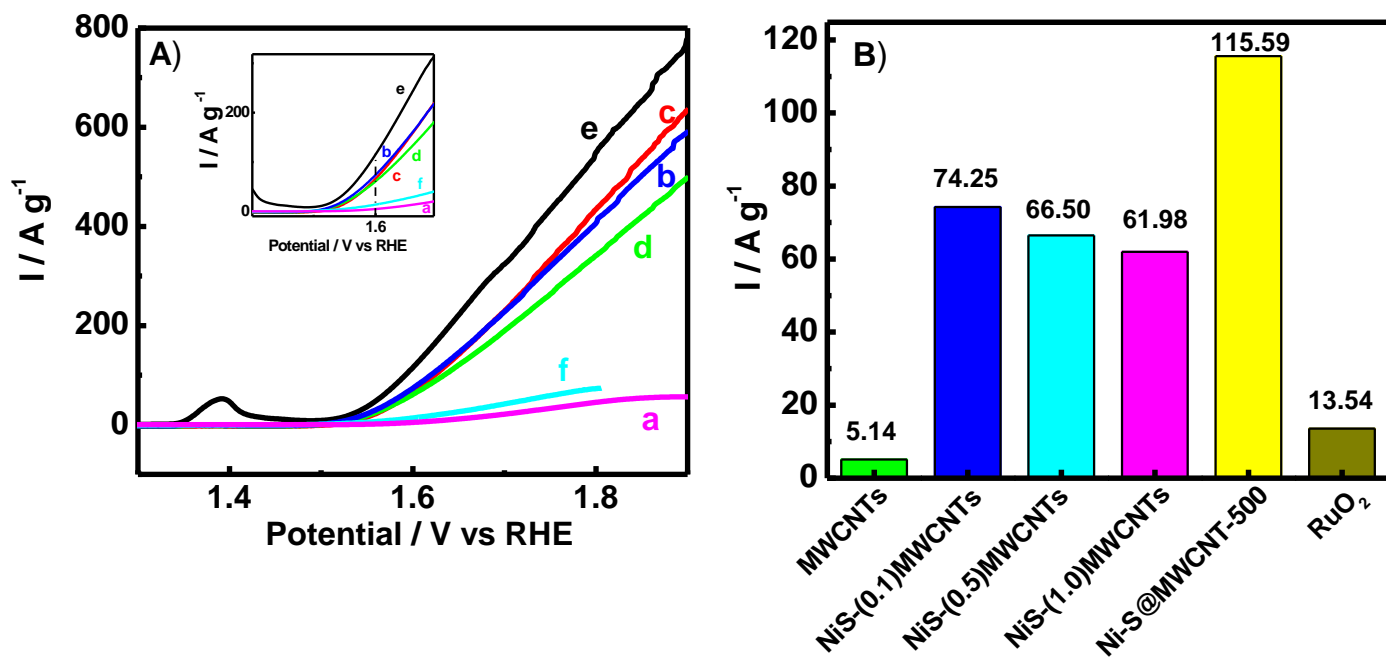

**Fig. S4** A) LSV curves representing the mass activity of a) MWCNTs, b) NiS-(0.1)@MWCNTs, c) NiS-(0.5)@MWCNTs, d) NiS-(1.0)@MWCNTs, e) Ni-S@MWCNTs-500, and f)  $RuO_2$ .

B) Bar graph showing the mass activity at 1.6 V vs. RHE.

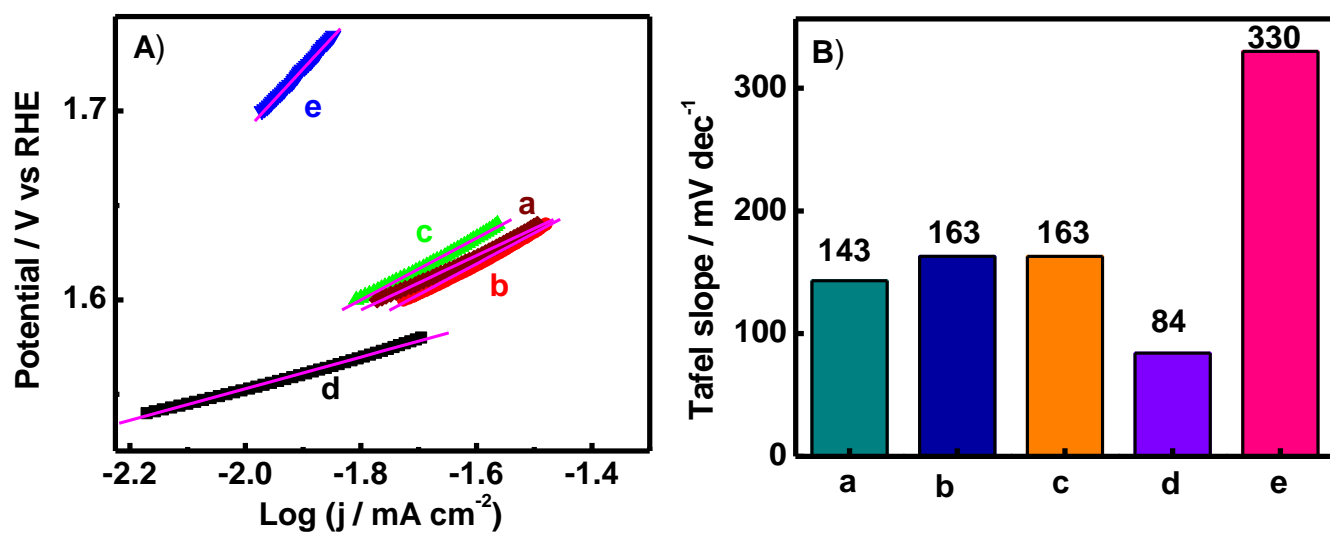

**Fig. S5** A) Tafel slope for a) GC/NiS-(0.1)@MWCNTs, b) GC/NiS-(0.5)@MWCNTs, c) GC/NiS-(1.0)@MWCNTs, d) GC/ Ni-S@MWCNT-500, and e) RuO<sub>2</sub>.  
 B) Bar diagram of the Tafel slope values for the respective electrodes.

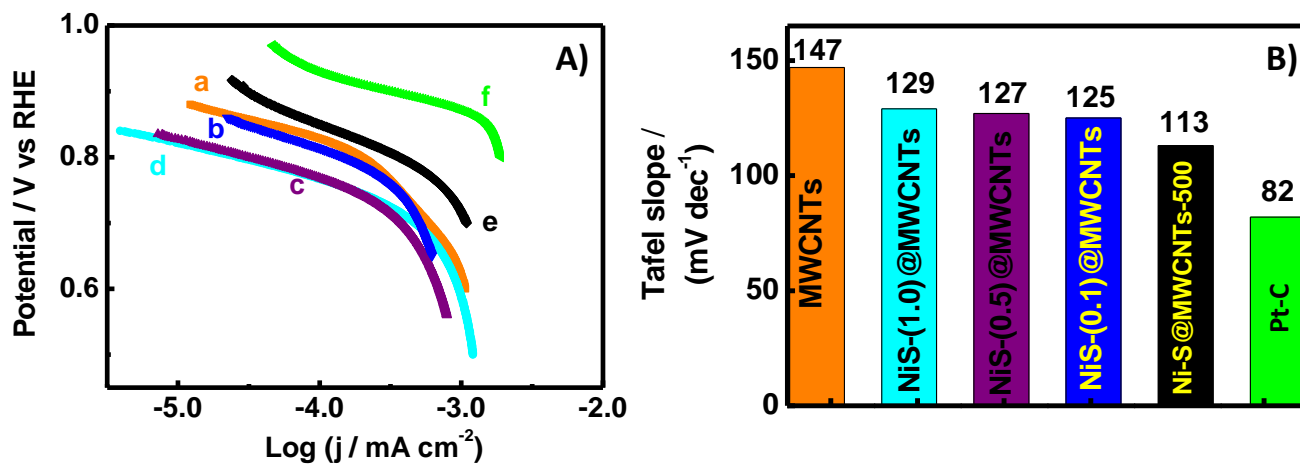

**Fig. S6** A) Tafel slope of a) MWCNTs, b) NiS(0.1)@MWCNTs, c) NiS(0.5)@MWCNTs, d) NiS(1.0)@MWCNTs, e) Ni-S@MWCNTs-500, and f) Pt-C (20%), and B) bar diagram depicting the value of Tafel slopes of the corresponding material.

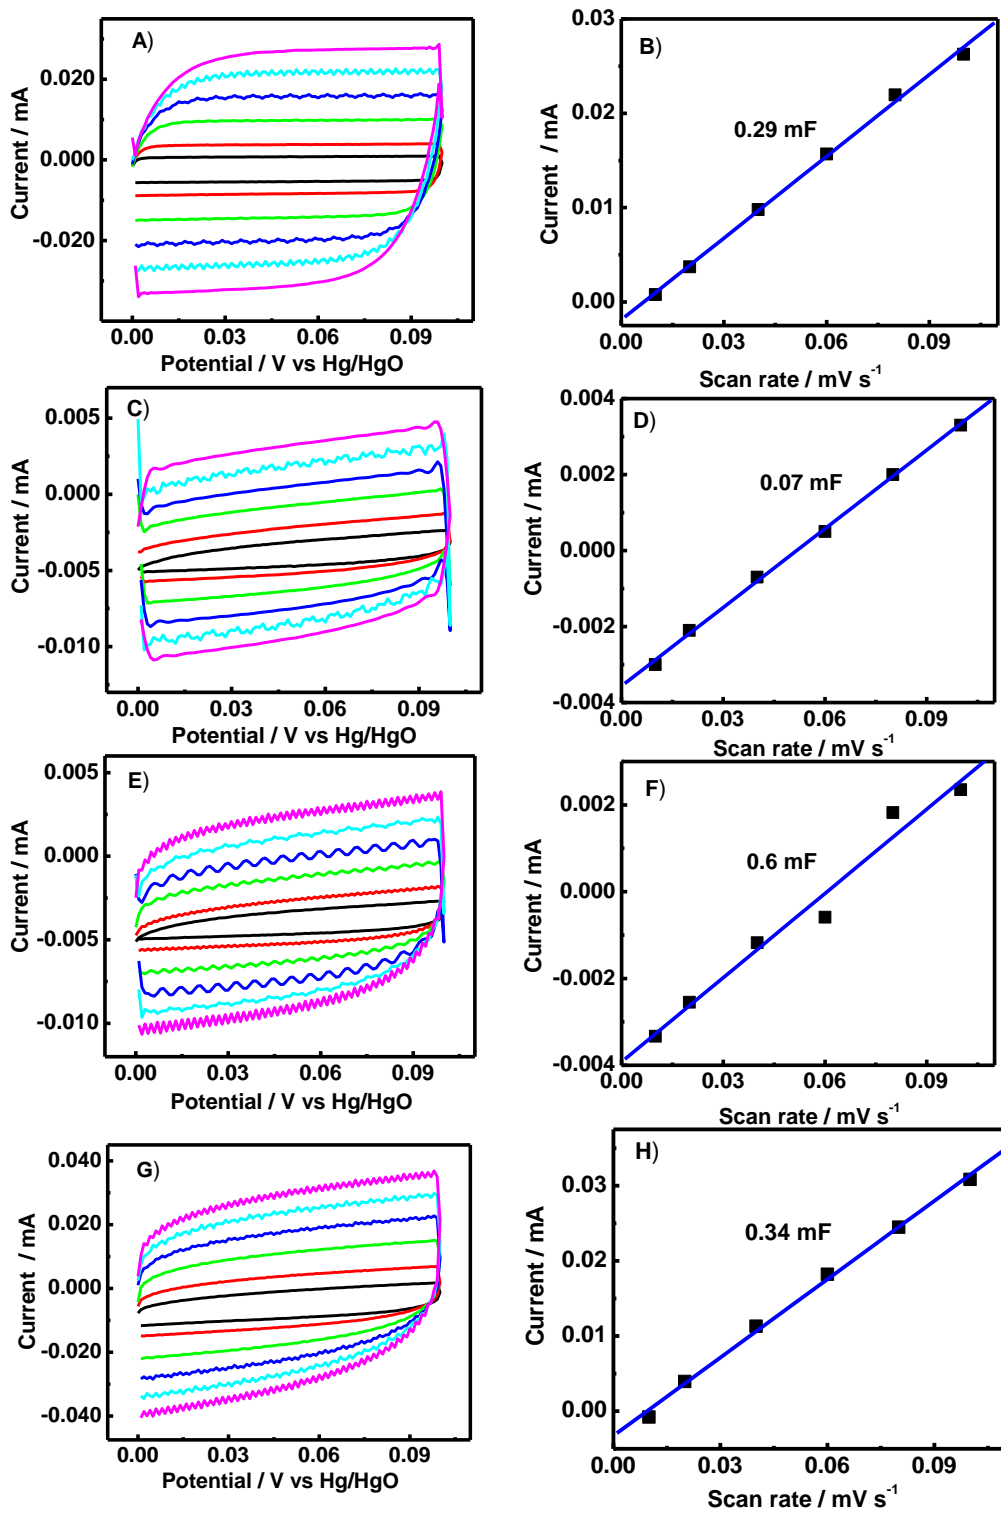

**Fig. S7** CV responses (A, C, E, and G) at different scan rates in the non-faradaic region and the plot of scan rate vs. current density (B, D, F, and H) for NiS-(0.1)@MWCNTs (A and B), NiS-(0.5)@MWCNTs (C and D), NiS-(1.0)@MWCNTs (E and F), and Ni-S@MWCNTs-500 (G and H).



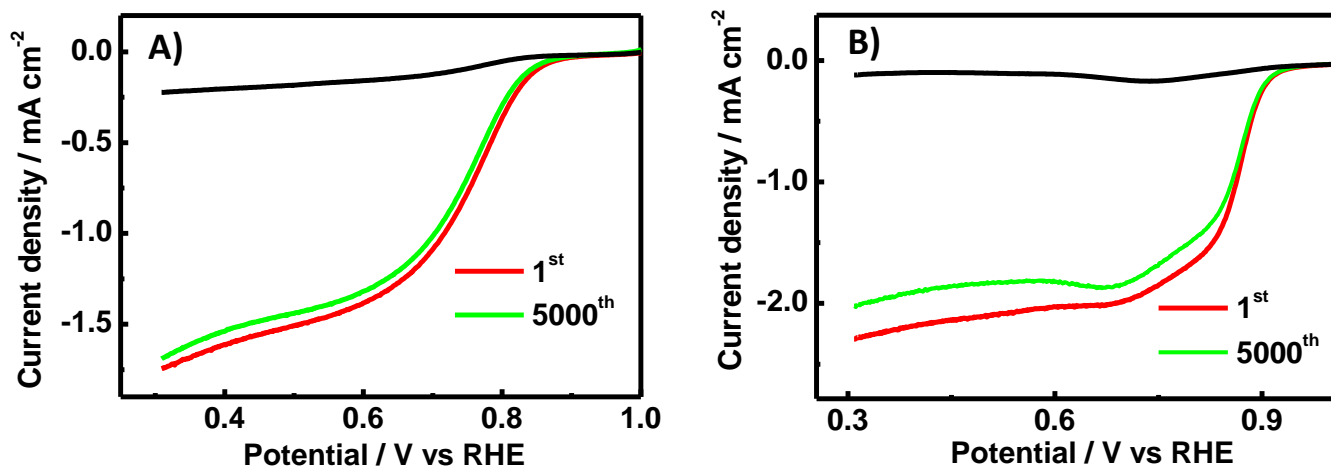

**Fig. S8** The LSV responses before and after the 5000 continuous CV cycles at A) Ni-S@MWCNTs-500 and B) Pt-C (20%) in O<sub>2</sub> saturated environment.

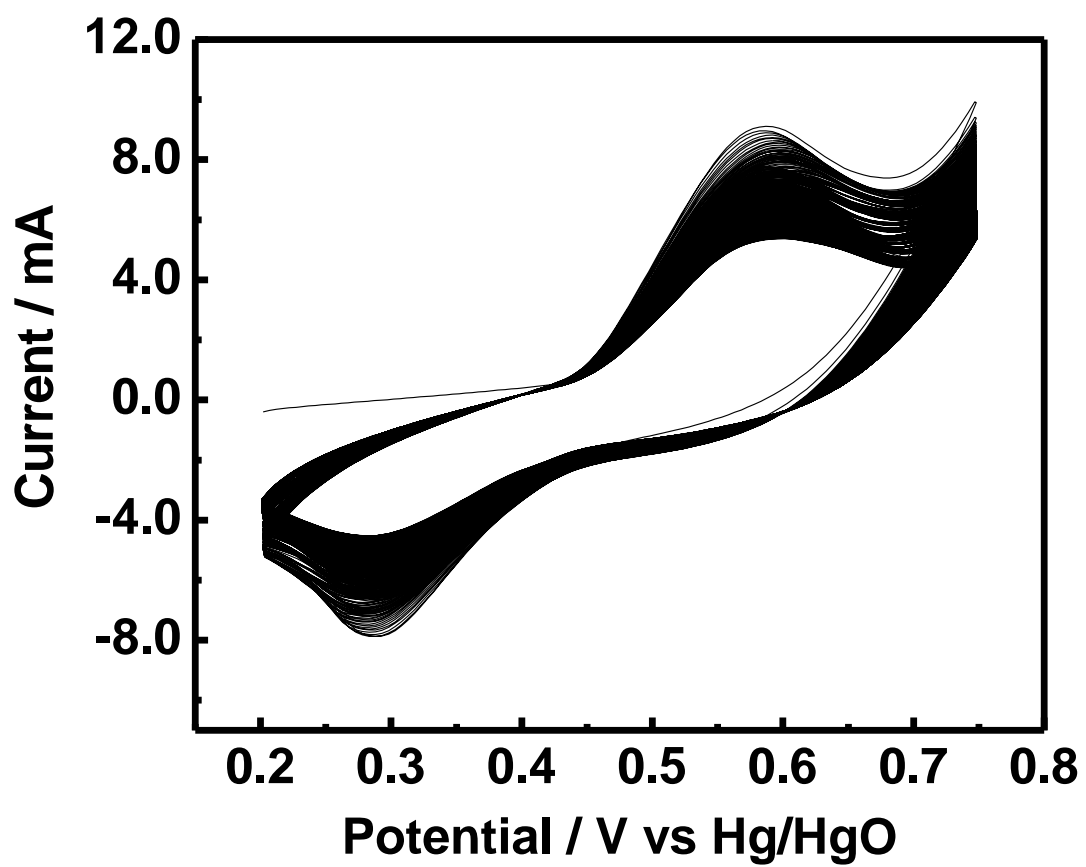

**Fig. S9** The 1000 continuous CV cycles recorded at Ni-S@MWCNTs-500 in 1.0 M KOH at the scan rate of  $300 \text{ mVs}^{-1}$ .

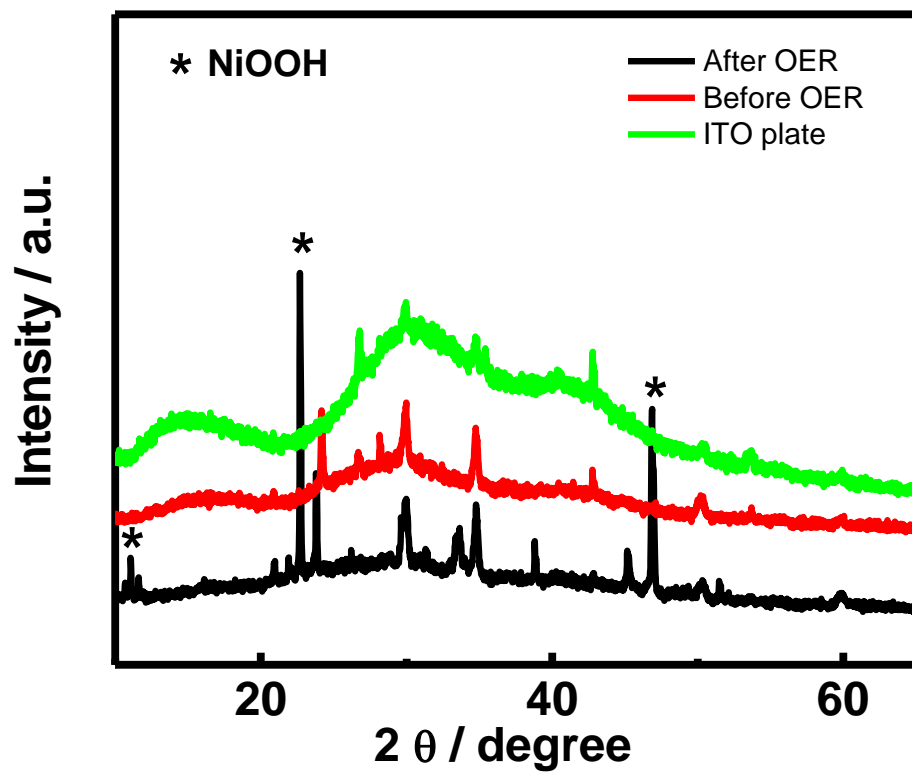

**Fig. S10** XRD patterns of Ni-S@MWCNTs-500 coated on an ITO glass plate, before and after the OER catalysis.

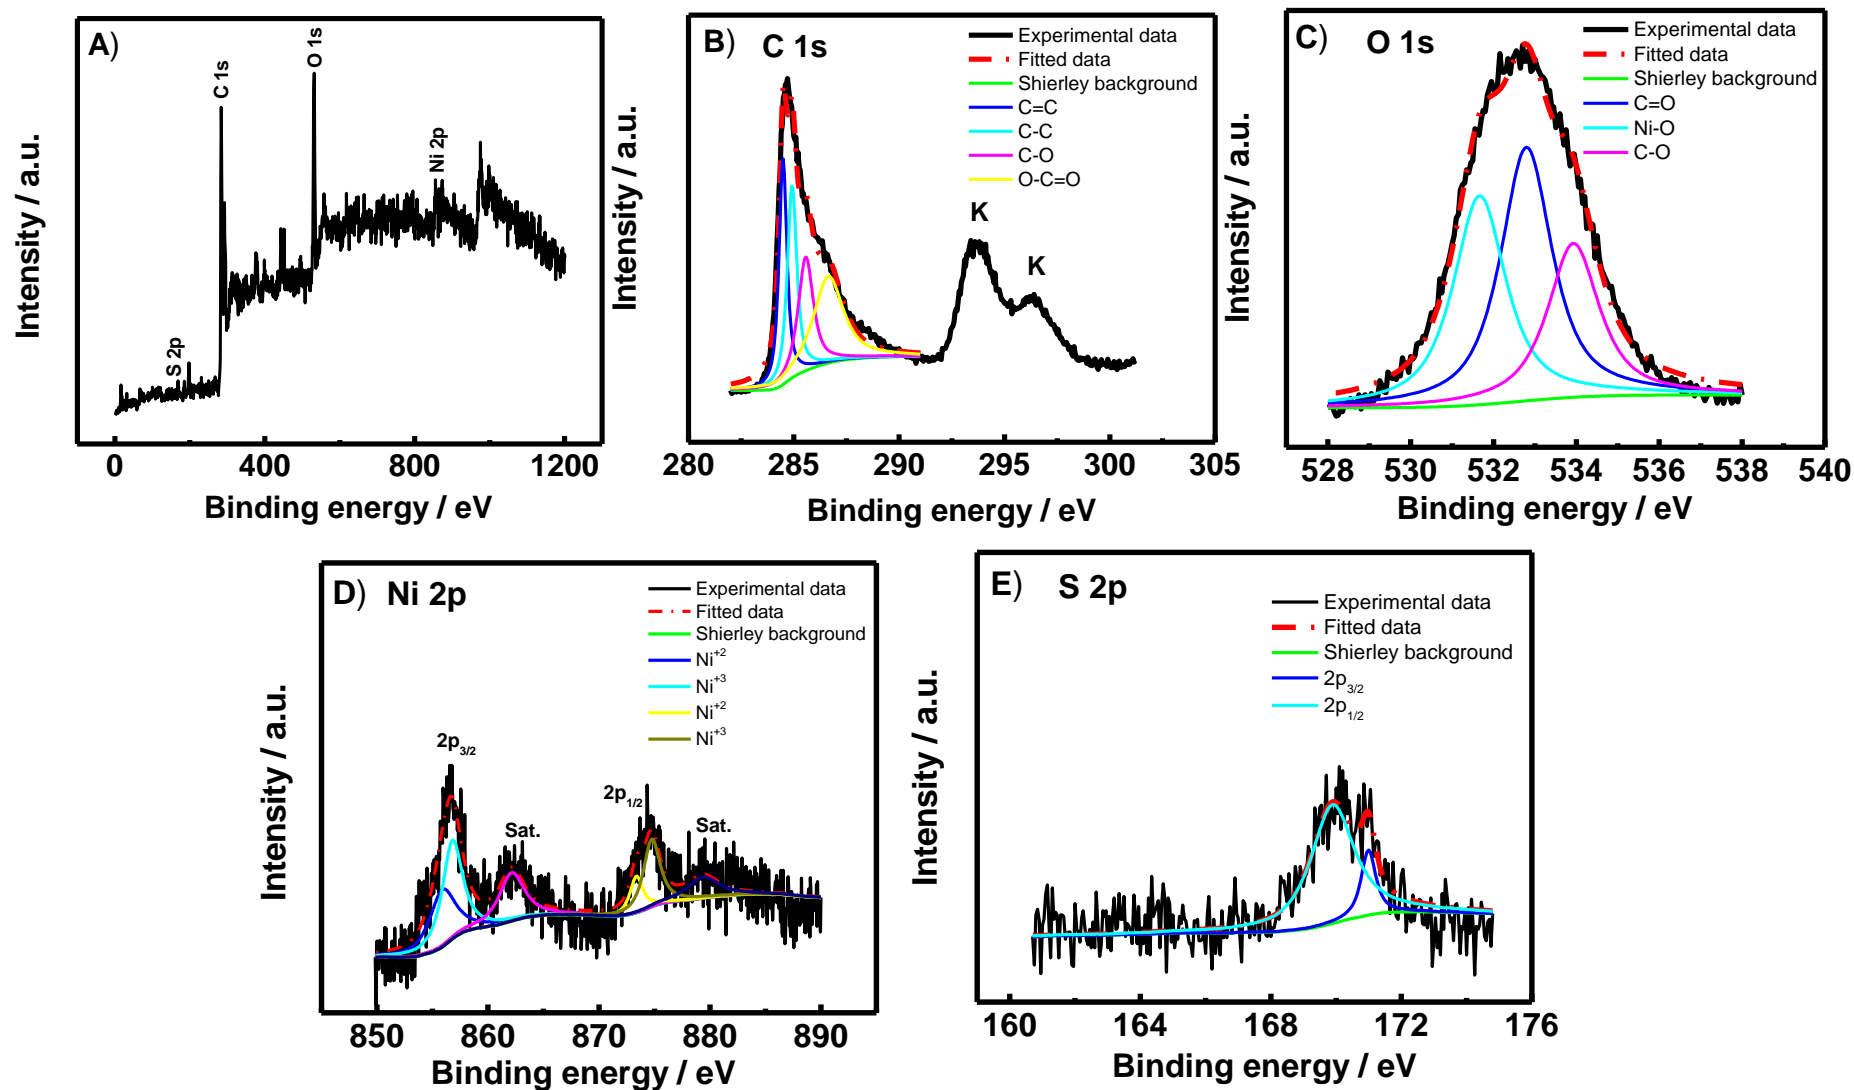

**Fig. S11** A) XPS survey spectra of Ni-S@MWCNTs-500 after the OER catalysis, with high-resolution scan for B) C 1s, C) O 1s, D) Ni 2p, and E) S 2p together with the respective de-convoluted spectra.
